# Supplementary material
Source: MDPI journal article supplement (https://www.mdpi.com/2075-163X/7/7/122)
Supplement: s1 [file s1]

# Supplementary Materials: Desiccator Volume: A Vital Yet Ignored Parameter in $\text{CaCO}_3$ Crystallization by the Ammonium Carbonate Diffusion Method

Joe Harris and Stephan E. Wolf

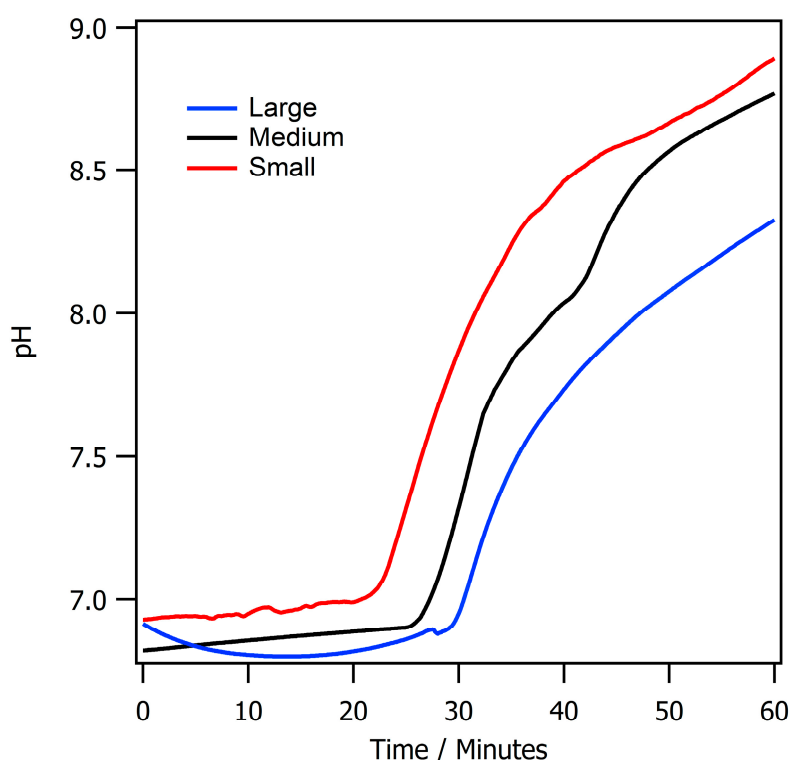

**Figure S1.** Temporal evolution of solution pH in the large, medium, and small desiccators.

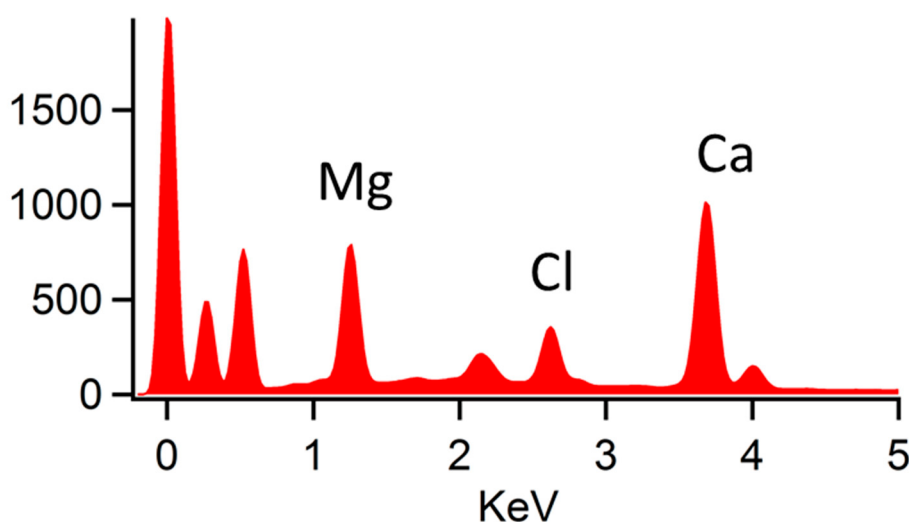

**Figure S2.** Energy dispersive X-ray analysis of magnesium doped amorphous calcium carbonate particles formed at the air-water interface in the small desiccator after 72 h. Calcium and magnesium peaks arise from the particles, whereas the chlorine peak is present due to residual salt, not removed by washing.
